# Supplementary material for: Highly Variable Bacterial Communities Associated with the Octocoral Antillogorgia elisabethae
Source: MDPI journal article supplement (doi:10.3390/microorganisms4030023), 2016-07-05
Supplement: s1 [file s1]

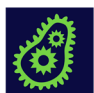

# Supplementary Materials: Highly Variable Bacterial Communities Associated with the Octocoral *Antillogorgia elisabethae*

Veronica Robertson <sup>1,†</sup>, Brad Haltli <sup>1,2,†</sup>, Erin P. McCauley <sup>1</sup>, David P. Overy <sup>2,3</sup> and Russell G. Kerr <sup>1,2,\*</sup>

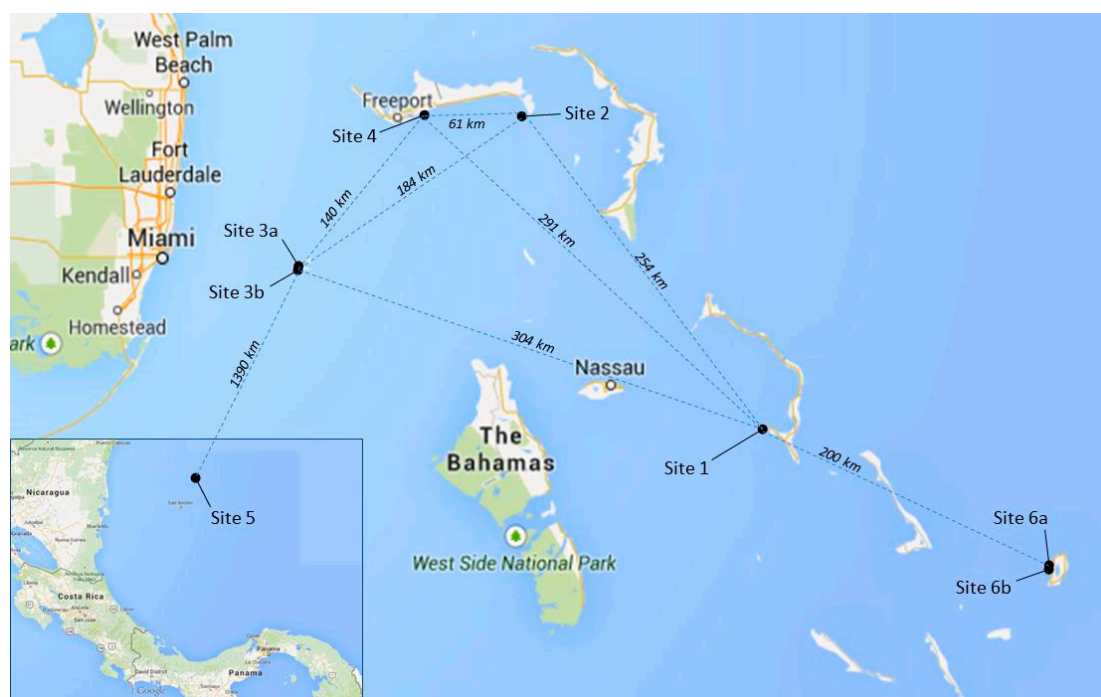

**Figure S1.** *A. elisabethae* sampling locations. Inset map shows the location of Providencia Island, approximately 1390 km from Bimini, The Bahamas. Approximate distance between collection sites is indicated adjacent to blue dashed lines. Map prepared using Google Maps™ mapping service. Google and the Google logo are registered trademarks of Google Inc., used with permission.

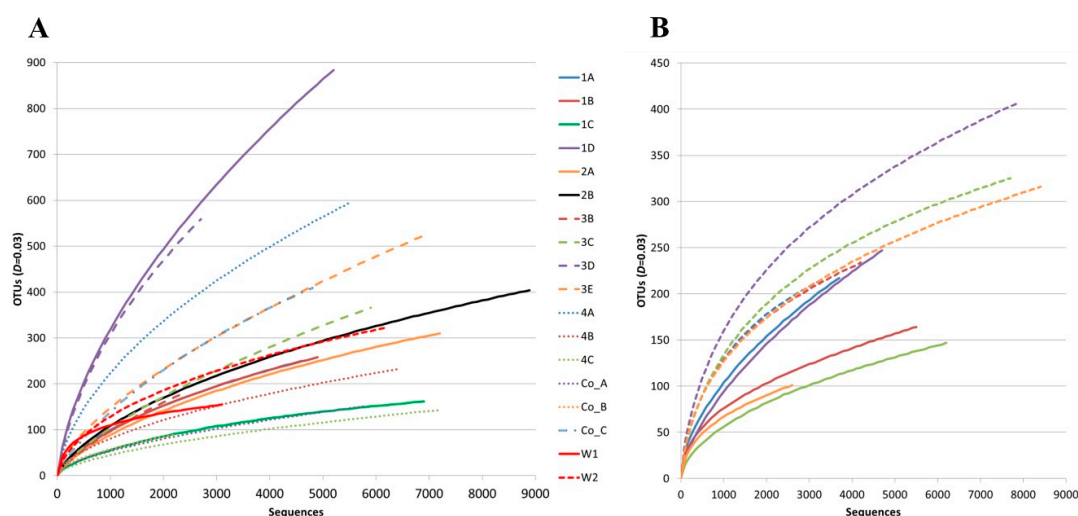

**Figure S2.** Rarefaction curves for *A. elisabethae* and seawater 16S rDNA libraries at 3% dissimilarity. A, rarefaction analysis of 16S rDNA sequences libraries covering the V1 and V2 regions. B, rarefaction analysis of 16S rDNA sequences libraries covering the V4 region.

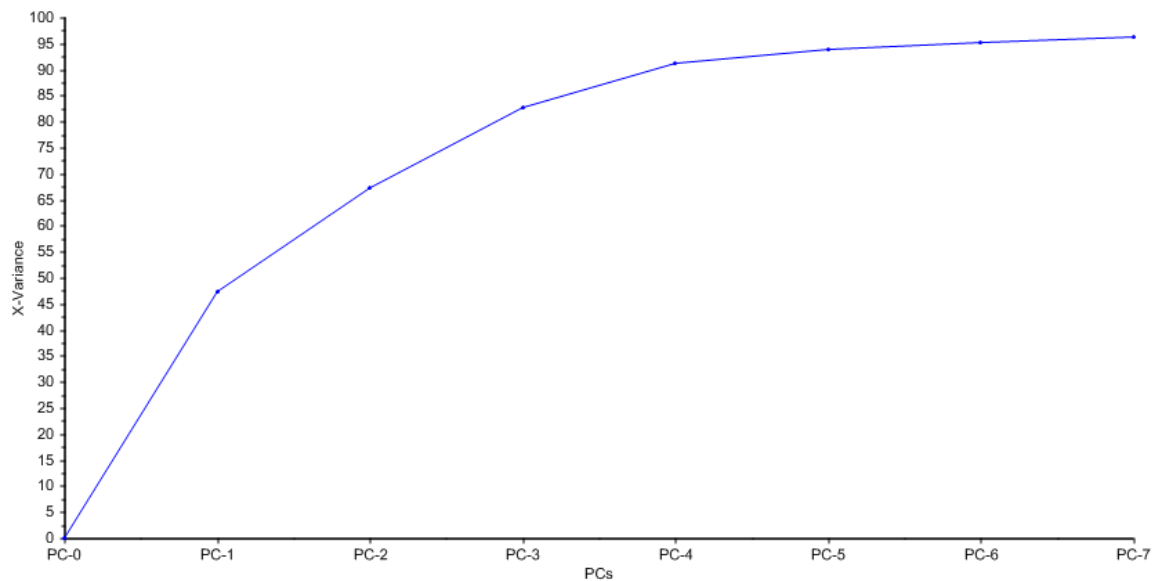

**Figure S3.** Explained variance plot showing explained (x)-variance reaches an asymptote at 4 PCs.

**Table S1.** Alpha numeric code for representative sequences (Rep. Seq.) for each OTU mentioned in the results. Sequences can be retrieved from the NCBI Sequence Read Archive (SRA) under Bioproject accession number PRJNA313050.

| V4 Dataset OTUs |                | V1/V2 Dataset OTUs |                |
|-----------------|----------------|--------------------|----------------|
| OTU             | Rep. Seq       | OTU                | Rep. Seq.      |
| OTU0003         | H8Y4T4E02IY3WH | OTU0001            | GF13U7302DWR0W |
| OTU0005         | H8Y4T4E02GUN56 | OTU0002            | GF13U7302DB06L |
| OTU0007         | H8Y4T4E02JSI5B | OTU0003            | GF13U7302D0DJV |
| OTU0010         | HXC1SGT02I303H | OTU0004            | GYBHR2K02C6LOW |
| OTU0012         | H8Y4T4E02INYCB | OTU0008            | GF13U7302E10SR |
| OTU0014         | HXC1SGT02IK70  | OTU0015            | GF13U7302DVIP6 |
| OTU0017         | H8Y4T4E02IV1W3 | OTU0016            | GF13U7302EEV5G |
| OTU0023         | HXC1SGT02IMA6V | OTU0018            | GYBHR2K02ES9BF |
| OTU0031         | H8Y4T4E02HDUP1 | OTU0019            | GF13U7302DEEPU |
| OTU0032         | H8Y4T4E02H48TI | OTU0020            | GF13U7302ELB6C |
| OTU0033         | HXV11MC01C55OH | OTU0021            | GF13U7302DDSYD |
| OTU0036         | H8Y4T4E02HTA8H | OTU0023            | GF13U7302DWT0U |
| OTU0041         | H8Y4T4E02H8HVX | OTU0036            | GYBHR2K02EQY10 |
| OTU0043         | H8Y4T4E02FYX5A | OTU0037            | GYBHR2K02DJFS5 |
| OTU0044         | H8Y4T4E02GS8E9 | OTU0043            | GF13U7302ETX6W |
| OTU0046         | H8Y4T4E02HF6HS | OTU0048            | GYBHR2K02DSKC9 |
| OTU0054         | H8Y4T4E02HBE4Z | OTU0054            | GF13U7302C2ZL6 |
| OTU0055         | H8Y4T4E02IMUNU | OTU0056            | GYBHR2K02EWFDP |
| OTU0056         | HXC1SGT02FW6E4 | OTU0057            | GF13U7302DRR8E |
| OTU0085         | H8Y4T4E02HOGM4 | OTU0061            | GF13U7302C9HYN |
| OTU0088         | H8Y4T4E02H0TK5 | OTU0075            | GF13U7302ESYU7 |
| OTU0092         | H8Y4T4E02HCA5W | OTU0079            | GF13U7302D619L |
| OTU0096         | H8Y4T4E02JEY7V | OTU0086            | GF13U7302DW9VO |
| OTU0103         | HXV11MC01B898D | OTU0089            | GF13U7302EUQOB |
| OTU0106         | HXC1SGT02G5SDE | OTU0180            | GF13U7302DG9KV |
| OTU0114         | HXC1SGT02HAFLR | OTU0181            | GF13U7302EKRFN |
| OTU0115         | HXV11MC01DFROB | OTU0242            | GF13U7302DYTYZ |
| OTU0118         | HXV11MC01DRHL1 |                    |                |
| OTU0129         | HXV11MC01AYLTC |                    |                |
| OTU0136         | HXV11MC01C4I3Q |                    |                |
| OTU0143         | HXV11MC01EMF8M |                    |                |
| OTU0144         | HXV11MC01C41BD |                    |                |

Table S1. Cont.

|         |                |
|---------|----------------|
| OTU0163 | HXV11MC01DDL87 |
| OTU0164 | H8Y4T4E02HTBIG |
| OTU0172 | HXV11MC01DA7FW |
| OTU0193 | HXV11MC01CQRF0 |
| OTU0194 | H8Y4T4E02G8MOG |
| OTU0197 | HXV11MC01BYHTR |
| OTU0198 | H8Y4T4E02JFPNY |
| OTU0222 | H8Y4T4E02H6ATR |
| OTU0225 | H8Y4T4E02IMLE4 |
| OTU0243 | HXV11MC01AXZ3H |
| OTU0251 | H8Y4T4E02J4ZHC |
| OTU0321 | H8Y4T4E02GCAF2 |
| OTU0329 | HXV11MC01DWF91 |
| OTU0344 | H8Y4T4E02I04PM |
| OTU0430 | HXV11MC01ACPEJ |
| OTU0434 | H8Y4T4E02IA7IJ |

**Table S2.** Statistical comparison (Mann-Whitney test) of bacterial diversity between coral (H17, H18, H26) and seawater samples (W13–W26) collected from San Salvador. Abbreviations: Shannon diversity ( $H'$ ) and evenness ( $E$ ), observed ( $S_{obs}$ ) and estimated ( $S_{est}$ ) richness. Tests were conducted in MiniTab 17 and differences were considered significant if  $P < 0.05$ .

| Diversity Measure | Sample | Median | P      |
|-------------------|--------|--------|--------|
| $S_{obs}$         | coral  | 101    | 0.0369 |
|                   | water  | 197    |        |
| $S_{est}$         | coral  | 190    | 0.5510 |
|                   | water  | 324    |        |
| $H'$              | coral  | 2.25   | 0.0369 |
|                   | water  | 3.32   |        |
| $E$               | coral  | 0.49   | 0.0369 |
|                   | water  | 0.63   |        |

**Table S3.** Statistical significance ( $P$ ) of tests used to compare the community structure of (1) bacterial communities in *A. elisabethae* and seawater and (2) the structure of bacterial communities from *A. elisabethae* collected from different geographic locations. BS—The Bahamas, CO—Colombia, UW—unweighted.

| Comparison                          | Data Set | Yue-Clayton Cladogram |            |
|-------------------------------------|----------|-----------------------|------------|
|                                     |          | Parsimony             | UW-UniFrac |
| Octocoral vs. Seawater <sup>a</sup> | V1/V2    | 0.031                 | 0.002      |
| BS vs. CO Octocorals <sup>b</sup>   | V1/V2    | 0.004                 | 0.011      |
| Octocoral vs. Seawater <sup>a</sup> | V4       | 0.004                 | 0.007      |

<sup>a</sup> Significance level  $P = 0.050$ ; <sup>b</sup> Bonferoni-corrected significance level  $IP = 0.017$ .

**Table S4.** Class level community composition (%) of *A. elisabethae* bacterial communities. Abbreviations: nd—not detected, tr—trace abundance (<0.1%).

| Class                        | 1A   | 1B   | 1C   | 1D   | 2A   | 2B   | 3B   | 3C   | 3D   | 3E   | 4A   | 4B   | 4C   | Co_A | Co_B | Co_C | H13  | H15  | H17  | H18  | H26  |
|------------------------------|------|------|------|------|------|------|------|------|------|------|------|------|------|------|------|------|------|------|------|------|------|
| Acidobacteria                | nd   | nd   | tr   | tr   | nd   | nd   | nd   | nd   | tr   | nd   | tr   | tr   | nd   | nd   | nd   | nd   | nd   | nd   | nd   | nd   | nd   |
| Actinobacteria               | 0.4  | 1.1  | 18.5 | 4.8  | 0.7  | 0.2  | tr   | 0.3  | 3.0  | 0.1  | 5.1  | 2.1  | 1.3  | 0.7  | 1.1  | 1.4  | 0.2  | tr   | 0.1  | tr   | 0.2  |
| Alphaproteobacteria          | 21.9 | 23.7 | 1.1  | 38.8 | 3.9  | 7.5  | 4.8  | 24.6 | 33.7 | 47.1 | 50.7 | 28.6 | 14.2 | 4.1  | 6.4  | 3.8  | 3.1  | 2.0  | 29.3 | 1.3  | 3.9  |
| Bacilli                      | 1.1  | 1.5  | 0.3  | 0.5  | 0.2  | tr   | nd   | nd   | 0.8  | tr   | 0.3  | 0.1  | tr   | nd   | tr   | tr   | tr   | tr   | nd   | nd   | 1.1  |
| Bacteroidia                  | tr   | nd   | tr   | tr   | tr   | tr   | nd   | 0.1  | tr   | tr   | 0.1  | tr   | tr   | tr   | tr   | nd   | nd   | nd   | nd   | tr   | nd   |
| Betaproteobacteria           | 0.4  | 1.3  | 1.0  | 0.2  | 1.1  | 0.2  | 0.2  | tr   | 1.3  | tr   | 0.3  | 1.0  | 0.6  | 0.2  | tr   | 0.1  | tr   | tr   | nd   | nd   | tr   |
| Chlamydiae                   | nd   | nd   | nd   | nd   | nd   | nd   | nd   | nd   | nd   | nd   | nd   | nd   | nd   | nd   | nd   | nd   | tr   | nd   | nd   | 0.1  | nd   |
| Clostridia                   | 1.2  | 1.0  | 0.3  | 0.3  | 1.3  | 0.2  | 0.1  | 1.2  | 11.7 | tr   | 0.2  | 3.4  | 0.2  | 0.2  | tr   | 0.2  | tr   | 0.6  | tr   | 0.1  | tr   |
| Cyanobacteria                | 54.6 | 52.7 | 23.9 | 6.2  | 37.8 | 0.8  | 0.7  | 1.1  | 6.2  | 2.0  | 6.7  | 51.0 | 4.8  | 0.3  | 4.3  | 0.9  | tr   | tr   | 0.8  | 0.3  | tr   |
| Deinococci                   | nd   | nd   | nd   | tr   | nd   | nd   | nd   | nd   | nd   | nd   | nd   | nd   | nd   | nd   | nd   | nd   | nd   | nd   | nd   | nd   | nd   |
| Deltaproteobacteria          | tr   | tr   | nd   | tr   | tr   | nd   | tr   | 0.1  | 0.9  | tr   | nd   | nd   | nd   | nd   | nd   | 0.2  | nd   | nd   | nd   | tr   | tr   |
| Epsilonproteobacteria        | nd   | nd   | tr   | tr   | nd   | nd   | nd   | nd   | tr   | nd   | nd   | nd   | nd   | nd   | nd   | nd   | 2.3  | 13.8 | nd   | 0.2  | 0.2  |
| Epsilonproteobacteria        | nd   | nd   | tr   | tr   | nd   | nd   | nd   | nd   | tr   | nd   | nd   | nd   | nd   | nd   | nd   | nd   | nd   | nd   | nd   | nd   | nd   |
| Erysipelotrichia             | tr   | tr   | nd   | nd   | tr   | nd   | nd   | nd   | 0.9  | nd   | nd   | nd   | nd   | nd   | nd   | nd   | nd   | nd   | nd   | nd   | nd   |
| Flavobacteria                | 1.4  | tr   | 50.6 | 0.6  | 0.9  | 0.3  | tr   | 64.3 | 5.6  | 31.3 | 0.1  | tr   | nd   | tr   | nd   | 1.0  | 1.3  | 3.5  | 1.1  | 3.1  | 24.2 |
| Fusobacteria                 | 0.1  | nd   | 0.1  | nd   | 0.4  | tr   | nd   | tr   | nd   | tr   | nd   | 0.2  | tr   | tr   | nd   | tr   | 1.5  | nd   | 0.2  | tr   | nd   |
| Gammaproteobacteria          | 14.0 | 15.6 | 0.7  | 6.7  | 49.7 | 77.3 | 86.0 | 0.3  | 2.8  | 3.8  | 11.2 | 12.3 | 78.4 | 83.3 | 73.9 | 80.4 | 77.1 | 61.6 | 16.3 | 42.7 | 55.5 |
| Gemmatimonadetes             | nd   | nd   | nd   | nd   | nd   | nd   | nd   | nd   | nd   | nd   | nd   | nd   | nd   | nd   | nd   | nd   | nd   | nd   | nd   | nd   | nd   |
| Lentisphaeria                | nd   | nd   | nd   | nd   | nd   | nd   | nd   | nd   | nd   | nd   | nd   | nd   | nd   | tr   | nd   | tr   | nd   | nd   | nd   | tr   | nd   |
| Mollicutes                   | tr   | nd   | nd   | nd   | nd   | nd   | nd   | nd   | nd   | nd   | nd   | nd   | nd   | nd   | nd   | nd   | nd   | nd   | nd   | nd   | nd   |
| Negativicutes                | nd   | nd   | nd   | nd   | nd   | nd   | nd   | nd   | nd   | nd   | nd   | tr   | nd   | nd   | nd   | nd   | nd   | nd   | nd   | nd   | nd   |
| Opitutae                     | tr   | nd   | nd   | tr   | tr   | nd   | nd   | nd   | 0.5  | nd   | nd   | tr   | nd   | nd   | nd   | 0.3  | nd   | nd   | tr   | nd   | nd   |
| Planctomycetacia             | 0.2  | 0.1  | tr   | 3.3  | 0.6  | 0.7  | 0.9  | 0.3  | 1.3  | tr   | 1.8  | nd   | tr   | nd   | nd   | 0.1  | nd   | tr   | tr   | nd   | 0.2  |
| Sphingobacteria              | nd   | tr   | tr   | tr   | tr   | nd   | nd   | tr   | 0.4  | 0.3  | tr   | nd   | nd   | 0.4  | 5.2  | 0.3  | tr   | 0.3  | 0.3  | tr   | nd   |
| Spirochaetes                 | nd   | tr   | tr   | nd   | nd   | tr   | nd   | nd   | nd   | nd   | nd   | nd   | nd   | nd   | nd   | nd   | nd   | nd   | nd   | nd   | nd   |
| Verrucomicrobiae             | nd   | nd   | nd   | tr   | tr   | nd   | nd   | tr   | 0.4  | nd   | nd   | nd   | nd   | tr   | tr   | tr   | nd   | tr   | tr   | 0.1  | tr   |
| TM7 incertae sedis           | nd   | nd   | nd   | nd   | nd   | nd   | nd   | nd   | nd   | nd   | nd   | nd   | nd   | nd   | nd   | nd   | nd   | nd   | nd   | nd   | nd   |
| Unclassified Bacteria        | 3.5  | 1.6  | 2.3  | 34.8 | 2.3  | 11.8 | 6.3  | 4.0  | 12.9 | 3.9  | 19.9 | 0.6  | 0.4  | 8.1  | 0.8  | 9.8  | 12.8 | 16.8 | 51.5 | 51.3 | 12.7 |
| Unclassified Bacterioidetes  | 0.2  | 0.2  | 0.3  | tr   | tr   | tr   | nd   | 0.2  | 0.9  | tr   | 0.2  | tr   | tr   | 0.2  | 0.1  | 0.4  | nd   | 0.1  | tr   | 0.3  | nd   |
| Unclassified Chloroflexi     | nd   | nd   | nd   | nd   | nd   | 0.1  | tr   | nd   | nd   | nd   | nd   | nd   | nd   | nd   | nd   | nd   | nd   | nd   | nd   | nd   | nd   |
| Unclassified Cyanobacteria   | tr   | nd   | tr   | tr   | tr   | nd   | nd   | nd   | nd   | nd   | nd   | nd   | nd   | nd   | tr   | 0.1  | nd   | tr   | nd   | nd   | nd   |
| Unclassified Firmicutes      | tr   | nd   | nd   | nd   | tr   | nd   | nd   | nd   | tr   | nd   | tr   | nd   | nd   | nd   | nd   | nd   | nd   | nd   | nd   | nd   | nd   |
| Unclassified Planctomycetes  | nd   | nd   | nd   | tr   | nd   | nd   | nd   | nd   | 0.2  | nd   | nd   | nd   | nd   | nd   | nd   | nd   | nd   | nd   | nd   | nd   | nd   |
| Unclassified Proteobacteria  | 0.4  | 1.0  | 0.4  | 3.5  | 0.8  | 0.8  | 0.8  | 3.2  | 16.3 | 11.2 | 3.3  | 0.5  | tr   | 2.3  | 8.0  | 0.7  | 1.3  | 1.1  | 0.2  | 0.3  | 1.7  |
| Unclassified Verrucomicrobia | nd   | nd   | nd   | nd   | tr   | nd   | nd   | tr   | nd   | nd   | nd   | nd   | nd   | nd   | nd   | tr   | nd   | nd   | nd   | tr   | nd   |
| Verrucomicrobia Subdivision3 | nd   | nd   | nd   | nd   | nd   | nd   | nd   | nd   | nd   | nd   | nd   | nd   | nd   | nd   | nd   | nd   | nd   | nd   | nd   | nd   | nd   |

**Table S5.** Class level community composition (%) of seawater bacterial communities. Abbreviations: nd—not detected, tr—trace abundance (<0.1%).

| Class                               | Percent Composition in Seawater Samples |      |      |      |      |      |      |
|-------------------------------------|-----------------------------------------|------|------|------|------|------|------|
|                                     | W1                                      | W2   | W13  | W15  | W17  | W18  | W26  |
| <i>Acidobacteria</i>                | tr                                      | nd   | tr   | nd   | tr   | nd   | nd   |
| <i>Actinobacteria</i>               | 9.5                                     | 0.1  | tr   | 0.4  | 0.3  | 4.2  | tr   |
| <i>Alphaproteobacteria</i>          | 17.6                                    | 2.8  | 3.1  | 3.2  | 4.6  | 18.1 | 5.0  |
| <i>Bacilli</i>                      | 6.2                                     | nd   | nd   | tr   | 0.2  | 0.3  | tr   |
| <i>Bacteroidia</i>                  | nd                                      | nd   | nd   | nd   | nd   | tr   | nd   |
| <i>Betaproteobacteria</i>           | 2.8                                     | tr   | 0.1  | 0.2  | tr   | tr   | 0.2  |
| <i>Chlamydiae</i>                   | tr                                      | nd   | nd   | 0.1  | tr   | nd   | nd   |
| <i>Clostridia</i>                   | 5.1                                     | tr   | tr   | nd   | tr   | tr   | nd   |
| <i>Cyanobacteria</i>                | 15.4                                    | 29.8 | 31.4 | 31.0 | 35.8 | 22.6 | 32.2 |
| <i>Deinococci</i>                   | 1.1                                     | nd   | tr   | nd   | nd   | nd   | tr   |
| <i>Deltaproteobacteria</i>          | tr                                      | tr   | nd   | 0.1  | 0.2  | 0.4  | 0.1  |
| <i>Epsilonproteobacteria</i>        | nd                                      | nd   | tr   | nd   | nd   | nd   | nd   |
| <i>Epsilonproteobacteria</i>        | nd                                      | nd   | nd   | nd   | nd   | nd   | nd   |
| <i>Erysipelotrichia</i>             | nd                                      | nd   | nd   | nd   | nd   | nd   | nd   |
| <i>Flavobacteria</i>                | 5.8                                     | 2.5  | 4.3  | 6.7  | 5.4  | 3.3  | 7.0  |
| <i>Fusobacteria</i>                 | nd                                      | tr   | tr   | nd   | tr   | nd   | tr   |
| <i>Gammaproteobacteria</i>          | 5.7                                     | 6.1  | 6.6  | 5.8  | 5.8  | 10.7 | 6.9  |
| <i>Gemmatimonadetes</i>             | nd                                      | nd   | nd   | nd   | nd   | nd   | nd   |
| <i>Lentisphaeria</i>                | tr                                      | nd   | nd   | nd   | nd   | nd   | nd   |
| <i>Mollicutes</i>                   | nd                                      | nd   | nd   | nd   | nd   | nd   | nd   |
| <i>Negativicutes</i>                | nd                                      | nd   | nd   | nd   | nd   | nd   | nd   |
| <i>Opitutae</i>                     | tr                                      | 1.5  | 2.6  | 1.3  | 0.9  | 0.8  | 1.8  |
| <i>Planctomycetacia</i>             | nd                                      | tr   | tr   | tr   | 0.1  | 0.2  | 0.1  |
| <i>Sphingobacteria</i>              | 1.1                                     | 0.1  | 0.4  | 0.5  | 0.4  | 0.8  | 0.5  |
| <i>Spirochaetes</i>                 | nd                                      | nd   | nd   | nd   | nd   | nd   | nd   |
| <i>Verrucomicrobiae</i>             | nd                                      | nd   | tr   | tr   | tr   | 0.1  | tr   |
| <i>TM7 incertae sedis</i>           | nd                                      | nd   | nd   | nd   | tr   | tr   | nd   |
| <b>Unclassified Bacteria</b>        | 20.8                                    | 40.1 | 31.9 | 32.8 | 29.6 | 23.2 | 28.1 |
| <b>Unclassified Bacteroidetes</b>   | 0.3                                     | 1.3  | tr   | 0.3  | 0.7  | 3.7  | 0.7  |
| <b>Unclassified Chloroflexi</b>     | nd                                      | tr   | nd   | nd   | nd   | nd   | nd   |
| <b>Unclassified Cyanobacteria</b>   | nd                                      | nd   | tr   | nd   | tr   | nd   | 0.1  |
| <b>Unclassified Firmicutes</b>      | tr                                      | tr   | nd   | nd   | nd   | nd   | nd   |
| <b>Unclassified Planctomycetes</b>  | nd                                      | nd   | nd   | nd   | nd   | nd   | nd   |
| <b>Unclassified Proteobacteria</b>  | 8.1                                     | 15.5 | 18.9 | 17.1 | 15.8 | 11.4 | 17.1 |
| <b>Unclassified Verrucomicrobia</b> | nd                                      | nd   | nd   | nd   | tr   | nd   | nd   |
| <b>Verrucomicrobia Subdivision3</b> | nd                                      | nd   | nd   | nd   | tr   | nd   | nd   |

**Table S6.** Taxa contributing to dissimilarity between seawater and *A. elisabethae* bacterial communities in SIMPER analyses.

| Data Set | Taxa                               | Contribution (%) |
|----------|------------------------------------|------------------|
| V1/V2    | <i>Alphaproteobacteria</i>         | 28.1             |
| V1/V2    | <i>Flavobacteria</i>               | 20.6             |
| V1/V2    | unclassified Bacteria              | 20.2             |
| V1/V2    | <i>Cyanobacteria</i>               | 15.7             |
| V4       | <i>Gammaproteobacteria</i>         | 25.6             |
| V4       | <i>Cyanobacteria</i>               | 25.0             |
| V4       | unclassified Bacteria              | 16.8             |
| V4       | unclassified <i>Proteobacteria</i> | 12.7             |
